# Supplementary material for: Construction and application of service quality evaluation system in the preclinical research on cardiovascular implant devices
Source: Springer Nature journal article supplement (doi:10.1186/s12911-019-0773-4), 2019-02-28
Supplement: MOESM1 [file 16517546]

## Expert score sheet for cardiovascular implant material preclinical research service quality evaluation

Experts,

In this study, the evaluation index system for preclinical research service quality of cardiovascular devices includes two levels. The first-level index layer includes four dimensions: professionalism, functionality, safety and reliability. Each primary dimensions is divided into several secondary indicators, as detailed in the following table.

| Primary dimensions | Secondary dimensions                                                              | Secondary indicators                                                                                                                                 |
|--------------------|-----------------------------------------------------------------------------------|------------------------------------------------------------------------------------------------------------------------------------------------------|
| professionalism    | Brand image of service supplier                                                   | The ranking among government, industry, manufacturers and users; the market share; The level of approved qualifications.                             |
|                    | Personnel's technical ability                                                     | The ratio of the number of qualified technical personnel to the total number of technical personnel                                                  |
|                    | Facility and hardware attractiveness                                              | The matching degree between the tools and the project task.                                                                                          |
|                    | professional service procedures                                                   | Established and practiced standardized service procedures                                                                                            |
| Functionality      | Functional integrity                                                              | According to the service agreement, completeness of service function being evaluated                                                                 |
|                    | Sufficiency                                                                       | According to the service agreement, the full extent of the service function being evaluated                                                          |
|                    | Reasonable communication mechanism                                                | Established an interactive communication mechanism and the status of being implemented                                                               |
|                    | Compliance                                                                        | The compliance of service function with relevant standards or regulations                                                                            |
| Stability          | Service Continuity                                                                | The ability to ensure that service agreements are met in all circumstances                                                                           |
|                    | Service stability                                                                 | Ability to provide consistent and stable service to meet agreed standards                                                                            |
|                    | report timely submission rate                                                     | Compare the number of service reports that are actually submitted on time to meet service agreement requirements with service agreement requirements |
| Security           | Suitability of the customer's available information resources permission settings | Whether access to information and resources can match business requirements                                                                          |
|                    | Information and resource readiness                                                | Within the agreed service period, whether information and resources can be normally visited or obtained.                                             |
|                    | Data auditability                                                                 | Ratio of the number of activities completely recorded to the number of activities to be recorded                                                     |
|                    | Data confidentiality capability of service supplier                               | Whether service supplier has established secure strategy and system, and how is it implemented.                                                      |

Here, please score the importance of indicators influencing the service quality for preclinical research on cardiovascular implant devices by comparing each other. 1/9-9 scaling method was used as the scoring principle which show the relative importance of the former factor compared with the latter factor. Please see the following table for the significance of score scale.

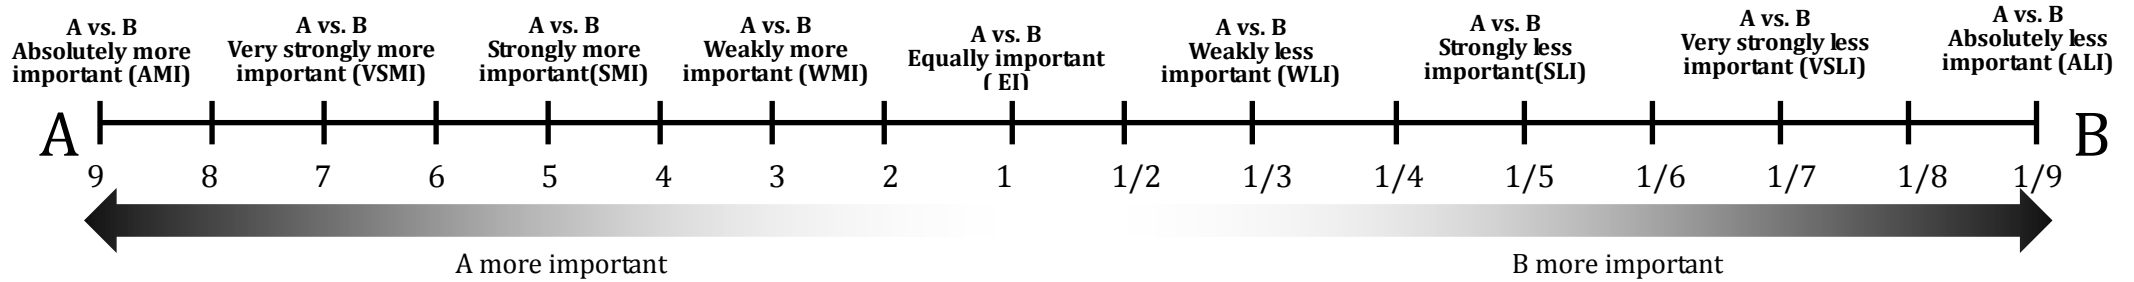

"Example" if you think that "functionality" (A) and "Security" (B) are between WLI and SLI, you are asked to grade:

| A             | B        | The importance in influencing the quality of preclinical research on cardiovascular implants, A vs.B |
|---------------|----------|------------------------------------------------------------------------------------------------------|
| functionality | Security | 1/4                                                                                                  |

Below, please grade importance of the factors that influence cold chain logistics development in Beijing by comparing each other.

| A                               | B                                 | A vs. B | A                                     | B                                              | A vs. B |
|---------------------------------|-----------------------------------|---------|---------------------------------------|------------------------------------------------|---------|
| professionalism                 | functionality                     |         | professionalism                       | Security                                       |         |
| professionalism                 | Stability                         |         | functionality                         | Stability                                      |         |
| functionality                   | Security                          |         | Stability                             | Security                                       |         |
| Brand image of supplier         | Personnel's technical ability     |         | Brand image of supplier               | Facility and equipment attractiveness          |         |
| Brand image of supplier         | Professional service procedures   |         | Personnel's technical ability         | Facility and equipment attractiveness          |         |
| Personnel's technical ability   | Professional service procedures   |         | Facility and equipment attractiveness | Professional service procedures                |         |
| Integrity of project completion | Sufficiency of project completion |         | Integrity of project completion       | Reasonable interactive communication mechanism |         |
| Integrity of project completion | Project compliance                |         | Sufficiency of project completion     | Reasonable interactive communication mechanism |         |

|                                    |                                                     |                |                                                |                                                     |                |
|------------------------------------|-----------------------------------------------------|----------------|------------------------------------------------|-----------------------------------------------------|----------------|
| Sufficiency of project completion  | Project compliance                                  |                | Reasonable interactive communication mechanism | Project compliance                                  |                |
| <b>A</b>                           | <b>B</b>                                            | <b>A vs. B</b> | <b>A</b>                                       | <b>B</b>                                            | <b>A vs. B</b> |
| Service continuity                 | Service stability                                   |                | Service continuity                             | Research report timely submission rate              |                |
| Service stability                  | Research report timely submission rate              |                | Service continuity                             | Research report timely submission rate              |                |
| Permission suitability             | Information and resource readiness                  |                | Permission suitability                         | Data auditability                                   |                |
| Permission suitability             | Data confidentiality capability of service supplier |                | Information and resource readiness             | Data auditability                                   |                |
| Information and resource readiness | Data confidentiality capability of service supplier |                | Data auditability                              | Data confidentiality capability of service supplier |                |
