# Supplementary material for: Construction and application of service quality evaluation system in the preclinical research on cardiovascular implant devices
Source: Springer Nature journal article supplement (doi:10.1186/s12911-019-0773-4), 2019-02-28
Supplement: MOESM3 [file 16517546]

|                                    |                                                      |
|------------------------------------|------------------------------------------------------|
| A                                  | B                                                    |
| 1. professionalism                 | functionality                                        |
| professionalism                    | Stability                                            |
| functionality                      | Security                                             |
| Brand image of supplier            | Personnel' s technical ability                       |
| Brand image of supplier            | Professional service procedures                      |
| Personnel' s technical ability     | Professional service procedures                      |
| Integrity of project completion    | Sufficiency of project completion                    |
| Integrity of project completion    | Project compliance                                   |
| Sufficiency of project completion  | Project compliance                                   |
| A                                  | B                                                    |
| Service continuity                 | Service stability                                    |
| Service stability                  | Research report timely submission rate               |
| Permission suitability             | Information and resource readiness                   |
| Permission suitability             | Data confidentiality capability of service suppliers |
| Information and resource readiness | Data confidentiality capability of service suppliers |

TABLE 3 Weight and prioritization of indicators and sub-indicators using FAHP.

|                    |                              |
|--------------------|------------------------------|
| Primary indicators | Weight of Primary indicators |
| professionalism    | 0.6457                       |

|               |        |
|---------------|--------|
| functionality | 0.1193 |
|---------------|--------|

|           |        |
|-----------|--------|
| Stability | 0.0596 |
|-----------|--------|

|          |        |
|----------|--------|
| Security | 0.1754 |
|----------|--------|

|         |                                                |
|---------|------------------------------------------------|
| A vs. B | A                                              |
|         | professionalism                                |
|         | functionality                                  |
|         | Stability                                      |
|         | Brand image of supplier                        |
|         | Personnel' s technical ability                 |
|         | Facility and equipment attractiveness          |
|         | Integrity of project completion                |
|         | Sufficiency of project completion              |
|         | Reasonable interactive communication mechanism |
| A vs.B  | A                                              |
|         | Service continuity                             |
|         | Service continuity                             |
|         | Permission suitability                         |
| er      | Information and resource readiness             |
| er      | Data auditability                              |

0.0596  
0.6457

| Sub-indicators      | Weight of sub-indicators |
|---------------------|--------------------------|
| Brand image C11     | 0.0276                   |
| Personnel' s techni | 0.2921                   |
| Facility and equipm | 0.2378                   |
| Professional servic | 0.0882                   |
| Integrity of projec | 0.0235                   |
| Sufficiency of proj | 0.016                    |
| Reasonable interact | 0.0085                   |
| Project compliance  | 0.0713                   |
| Service continuity  | 0.0189                   |
| Service stability C | 0.0346                   |
| Research report tim | 0.0061                   |
| Permission suitabil | 0.0112                   |
| Information and res | 0.0162                   |
| Data auditability C | 0.1208                   |
| Data confidentialit | 0.0272                   |

|                                                |         |
|------------------------------------------------|---------|
| B                                              | A vs. B |
| Security                                       |         |
| Stability                                      |         |
| Security                                       |         |
| Facility and equipment attractiveness          |         |
| Facility and equipment attractiveness          |         |
| Professional service procedures                |         |
| Reasonable interactive communication mechanism |         |
| Reasonable interactive communication mechanism |         |
| Project compliance                             |         |

|                                                     |         |
|-----------------------------------------------------|---------|
| B                                                   | A vs. B |
| Research report timely submission rate              |         |
| Research report timely submission rate              |         |
| Data auditability                                   |         |
| Data auditability                                   |         |
| Data confidentiality capability of service supplier |         |

0.1754  
0.1193

Priority

7  
1  
2  
4  
9  
12  
14  
5  
10  
6  
15  
13  
11  
3  
8
